# Supplementary material for: The food additive fast green FCF inhibits α-synuclein aggregation, disassembles mature fibrils and protects against amyloid-induced neurotoxicity
Source: Royal Society of Chemistry journal article supplement (doi:10.1039/d0fo03301d), 2021-01-01
Supplement: d0fo03301d1.pdf [file d0fo03301d1.pdf]

**Supplementary Information**

**The food additive fast green FCF inhibits  $\alpha$ -synuclein  
aggregation, disassembles mature fibrils and protects against  
amyloid-induced neurotoxicity**

**Fenghua Wang<sup>†</sup>, Ying Wang<sup>†</sup>, Luying Jiang, Wenqian Wang,  
Jingcheng Sang, Xinyu Wang, Fuping Lu, Fufeng Liu\***

State Key Laboratory of Food Nutrition and Safety, Key Laboratory of Industrial  
Fermentation Microbiology of the Ministry of Education; Tianjin Key Laboratory of  
Industrial Microbiology; College of Biotechnology, Tianjin University of Science &  
Technology, Tianjin 300457, P. R. China

**Corresponding Author**

\*Fufeng Liu, Phone: +86-22-60602717; Fax: +86-22-60602298; E-mail:  
[fufengliu@tust.edu.cn](mailto:fufengliu@tust.edu.cn)

<sup>†</sup>These authors contributed equally to this work.

**A**

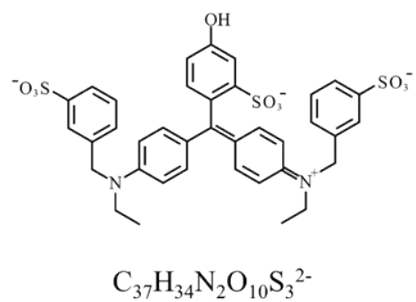

**B**

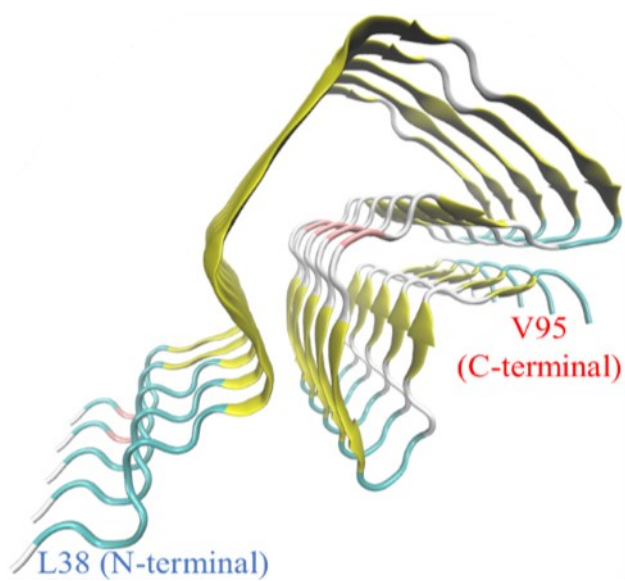

**Figure S1.** The structures of FGF (A) and  $\alpha$ -syn pentamer (B).

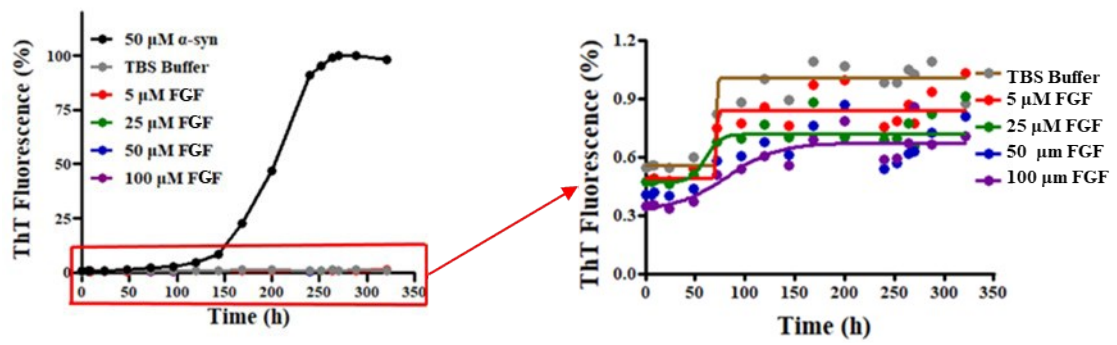

**Figure S2.** The effect of solid green itself on ThT fluorescence. The ThT signal was measured at an excitation wavelength of 440 nm and an emission wavelength of 480 nm. ThT without solid green or  $\alpha$ -syn was set as a negative control, and ThT of 50  $\mu$ M  $\alpha$ -syn was set as a positive control.

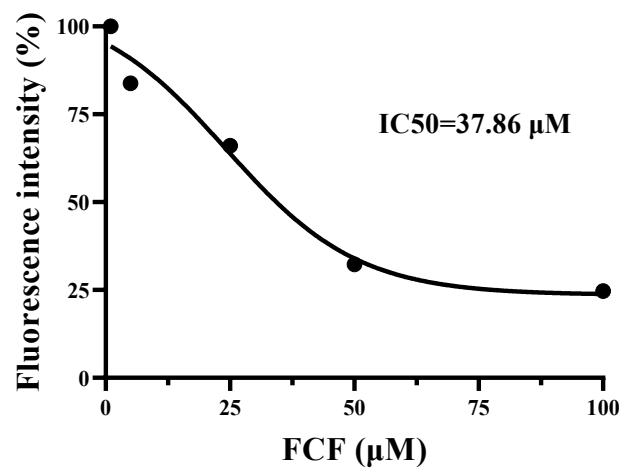

**Figure S3.** The inhibition of  $\alpha$ -syn aggregation by FGF. Reaction progress curves in the presence of increasing FGF concentration.

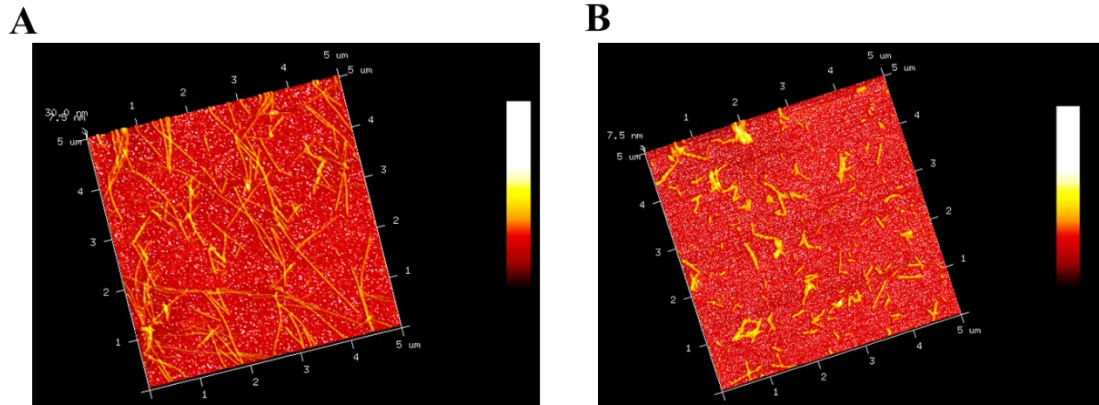

**Figure S4.** Three-dimensional AFM image of a recombinant  $\alpha$ -syn polymer. Incubate without adding FGF (A) and 100  $\mu$ M FGF (B).

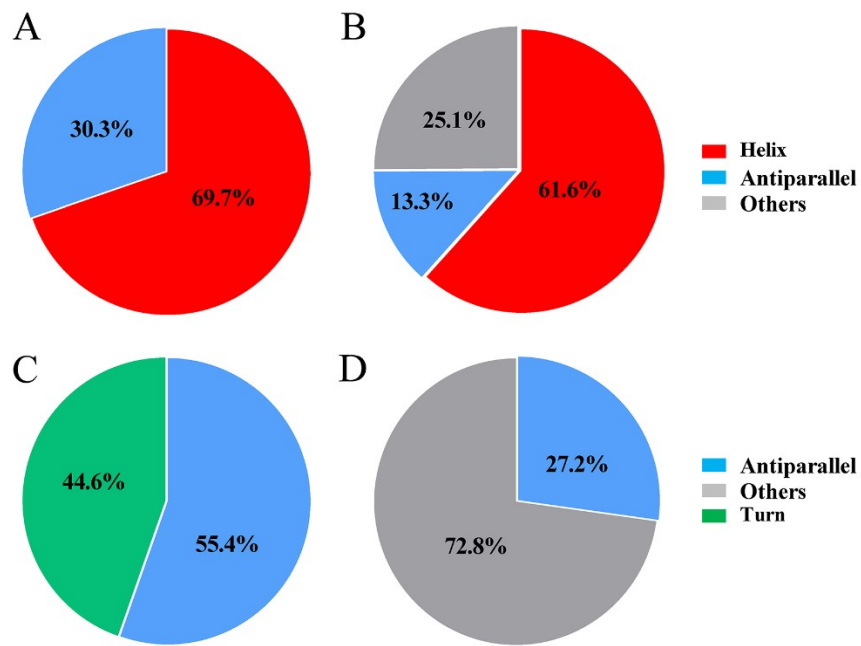

**Figure S5.** The ratios of secondary structure of initial  $\alpha$ -syn (A and B) and  $\alpha$ -syn incubated for 13 d (C and D) alone and with a 2-fold molar excess of FGF.

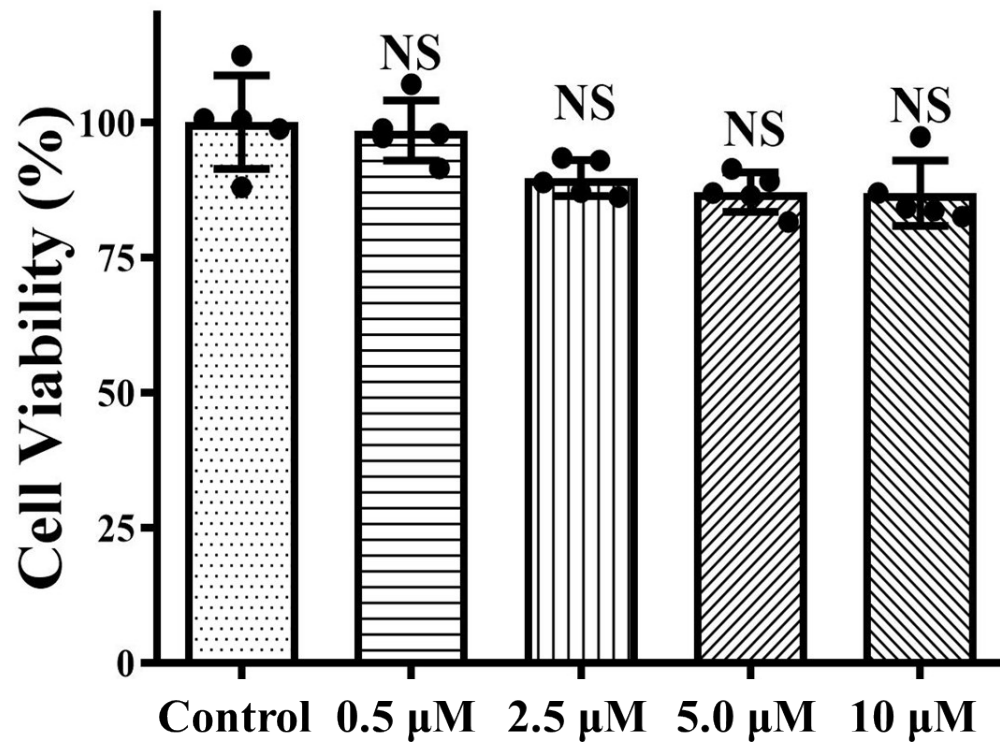

**Figure S6.** Cytotoxicity of FGF itself to PC12 cells. Values represent the mean  $\pm$  SD (n = 6). NS, not significant.
